# Supplementary material for: Fluorinated amphiphilic block copolymers via RAFT polymerization and their application as surf-RAFT agent in miniemulsion polymerization
Source: Royal Society of Chemistry journal article supplement (doi:10.1039/c4ra14151b), 2015-01-01
Supplement: c4ra14151b1.pdf [file c4ra14151b1.pdf]

### Supplementary Information

## **Fluorinated amphiphilic block copolymers via RAFT polymerization and its application as surf-RAFT agent in miniemulsion polymerization**

**Bishnu P. Koiry, Arindam Chakrabarty, Nikhil K. Singha\***

Rubber Technology Centre, Indian Institute of Technology Kharagpur,  
Kharagpur-721302, West Bengal, India

Tel.: +91 3222 283178, Fax: +91 3222 282700. E-Mail: [nks@rtc.iitkgp.ernet.in](mailto:nks@rtc.iitkgp.ernet.in)

Correspondence to: Nikhil K. Singha (E-mail: [nks@rtc.iitkgp.ernet.in](mailto:nks@rtc.iitkgp.ernet.in))

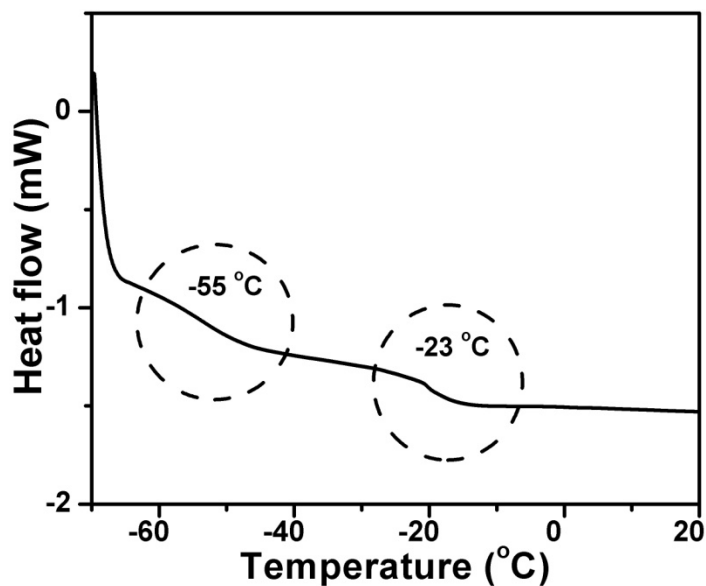

**Fig. S1** DSC thermogram of PPEGMA<sub>100</sub>-*b*-PHFBA<sub>86</sub>

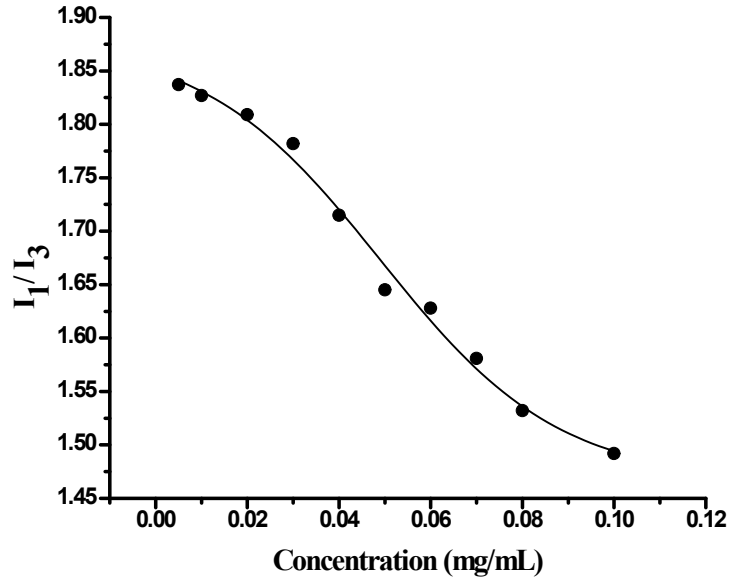

Fig. S2 The plot of  $I_1/I_3$  vs. concentration of Am-BCP, P(PEGMA)<sub>37</sub>-b-P(HFBA)<sub>35</sub>

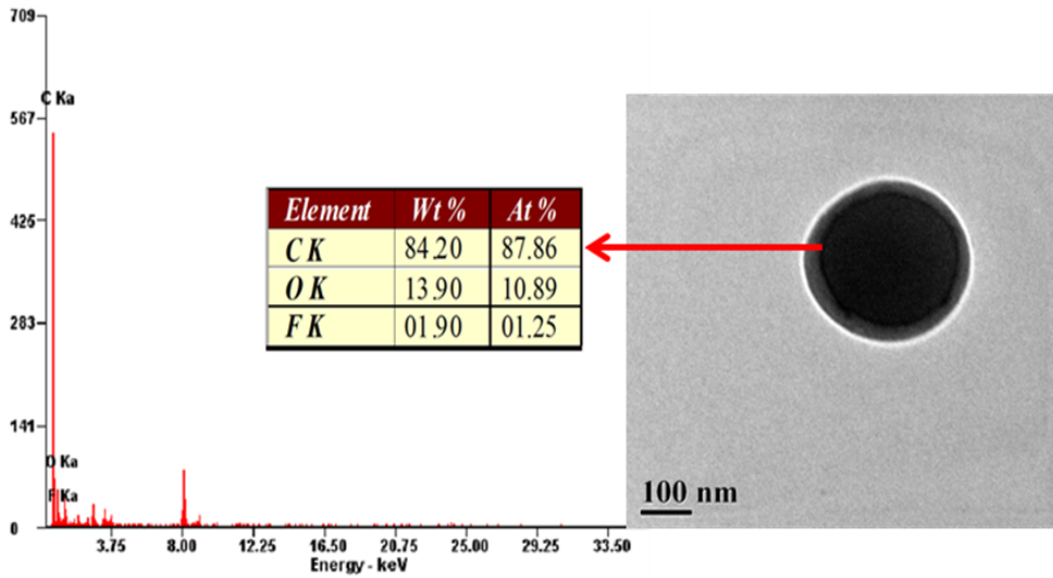

Fig. S3 EDAX of the polystyrene latex
